# Supplementary material for: What are the preferred horizontal displacements of aromatic–aromatic interactions in proteins? Comparison with the calculated benzene–benzene potential energy surface
Source: Royal Society of Chemistry journal article supplement (doi:10.1039/c3cp54474e), 2014-01-01
Supplement: c3cp54474e1.pdf [file c3cp54474e1.pdf]

## Supplementary Material

### What Are the Preferred Horizontal Displacements of Aromatic-Aromatic Interactions in Proteins? Comparison with Calculated Benzene-Benzene Potential Energy Surface

5 Dragan B. Ninković, Jelena M. Andrić, Saša N. Malkov and Snežana D. Zarić

#### Data from Protein Data Bank

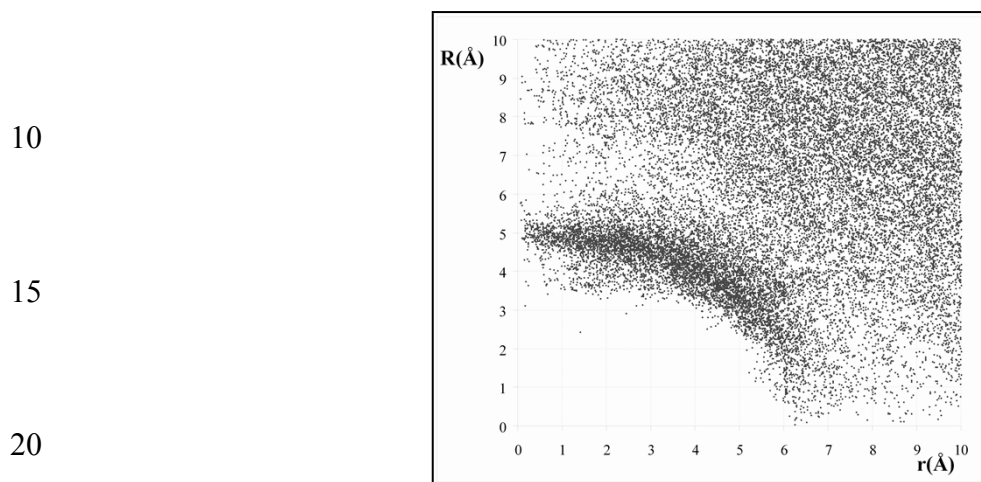

Fig. S1 The correlation of the normal distance (R) with the offset values (r) ;  $R < 10 \text{ \AA}$  and  $r < 10 \text{ \AA}$ .

25 The PDB search yielded 24 002 contacts in which centre of the phenyl ring from phenylalanine residue was found to be within the area that corresponds to  $R < 10 \text{ \AA}$  and  $r < 10 \text{ \AA}$  around another phenylalanine ring. The data suggest that two interacting rings form ellipsoid on diagram. The final number of 6 919 structures were extracted from initial set of structures using equation of an ellipsoid  $(x/a)^2 + (y/b)^2 = 1$  where  $a=(r)=7 \text{ \AA}$  and  $b=(R)=6 \text{ \AA}$ .

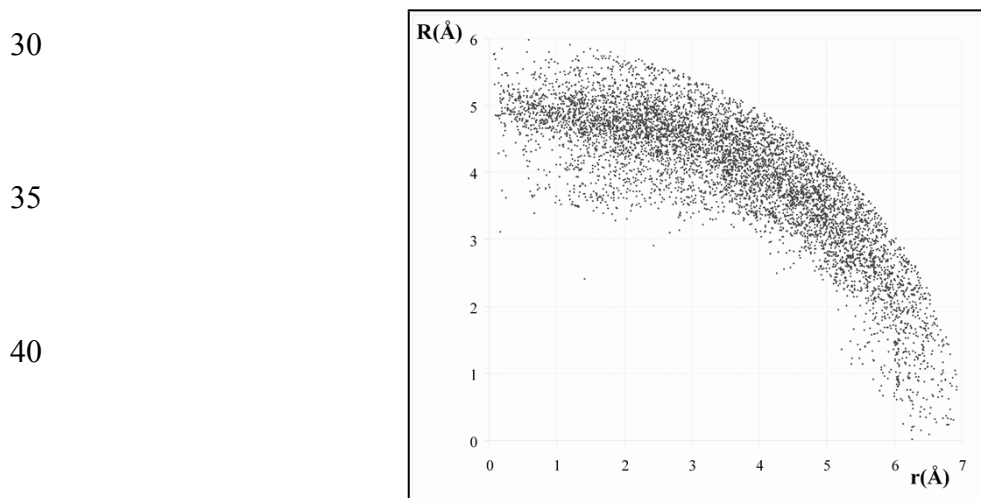

45 Fig. S2 The correlation of the normal distance (R) with the offset values (r) for ellipsoid with  $R = 6 \text{ \AA}$  and  $r = 7 \text{ \AA}$

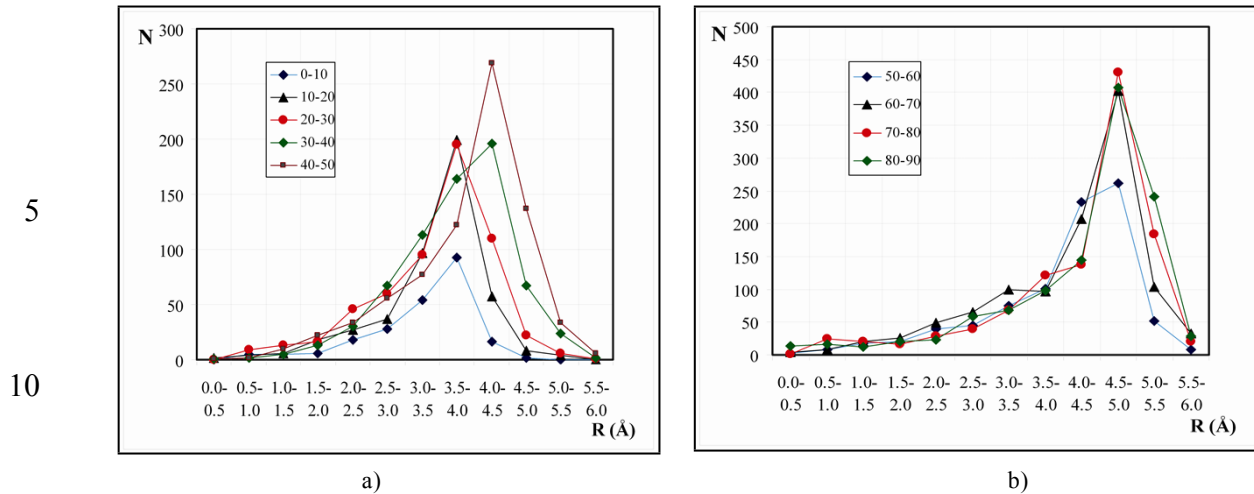

5  
10  
15 **Fig. S3** Distributions of normal distance  $R$  for various tilt angles a) for the tilt  $P_1/P_2$  angle in the range 0-50° b) for the tilt  $P_1/P_2$  angle in the range 50-90°

For the tilt angle  $P_1/P_2$  in the range 0-30° (Figure S3a) the distribution shows large number of interactions with  $R$  value in the range of 3.5-4.0 Å. These  $R$  values are typical for stacking interaction. The values of  $R$  increase with the tilt angles increase and reach its maximum in the range of 4.5-5.0 Å, for the torsion angles larger than 50° (Figure S3b).

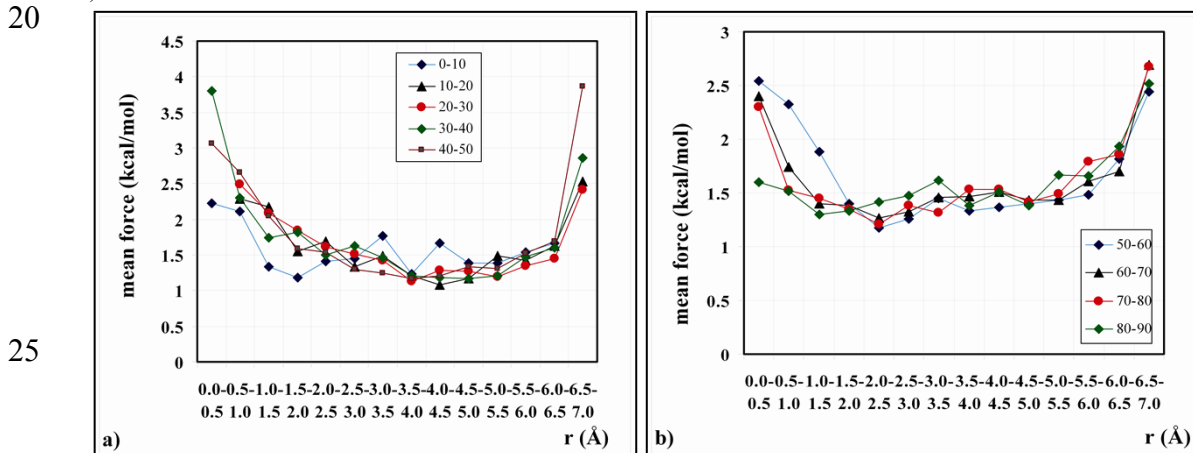

20  
25  
30 **Fig. S4** The mean force (according to Boltzmann law)[S1] for different  $r$  values a) for the tilt  $P_1/P_2$  angle in the range 0-50° b) for the tilt  $P_1/P_2$  angle in the range 50-90°

## Results of Calculations

The geometry of isolated benzene molecule was optimized using B2PLYP-D2/def2-TZVP method. The optimized benzene geometry is a planar regular hexagonal ring, with a C-C bond of 1.392 Å and a C-H bond of 1.082 Å.

5

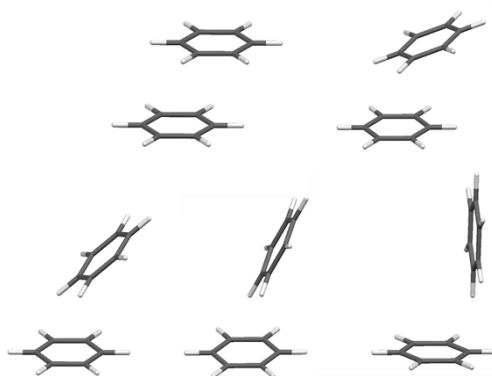

Fig. S5 The side view of the A orientation at different values of tilt angles (0°, 20°, 40°, 60° and 90°) for the offset  $r$  of 1.5 Å.

10

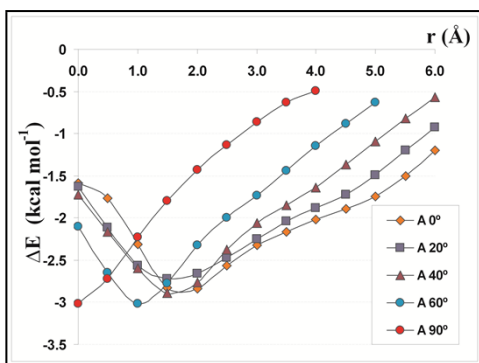

15

20

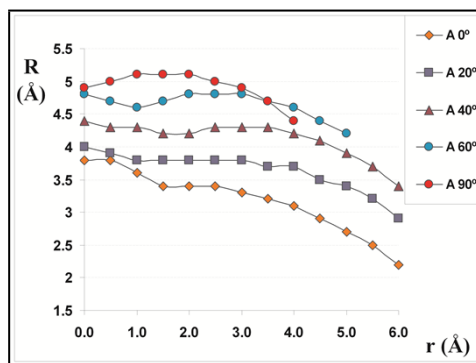

b)

25

30

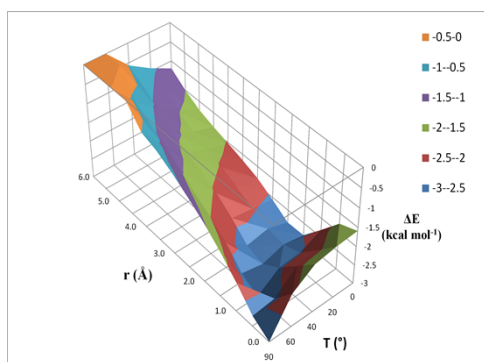

a)

35

Fig. S6 a) Calculated interaction energies ( $\Delta E$ ) presented on 2-D (up) and 3-D (down) diagrams; b) the optimal normal distances ( $R$ ) of orientation A (Figure S4) for values of tilt  $P_1/P_2$  angle of 0°, 20°, 40°, 60° and 90°. The values for angle 0° are obtained in 40 previous work<sup>15</sup>

5

10

15

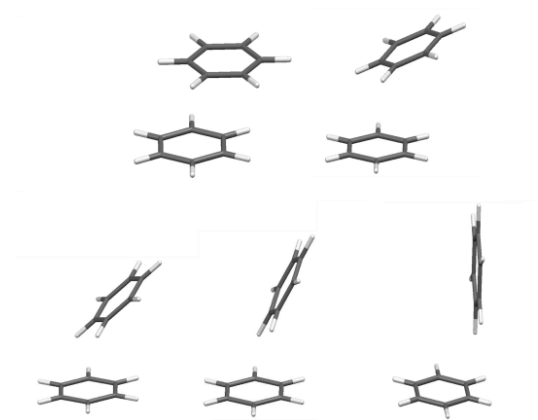

**Fig. S7** The side view of the B orientation at different values of tilt angles ( $0^\circ$ ,  $20^\circ$ ,  $40^\circ$ ,  $60^\circ$  and  $90^\circ$ ) for the offset  $r$  of  $1.5 \text{ \AA}$ .

20

25

30

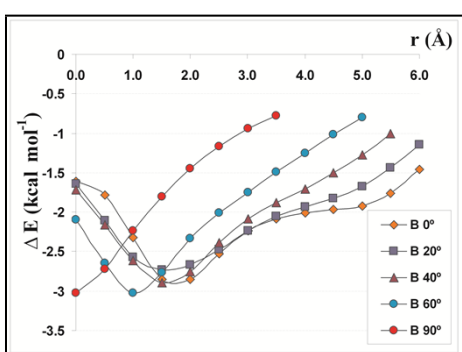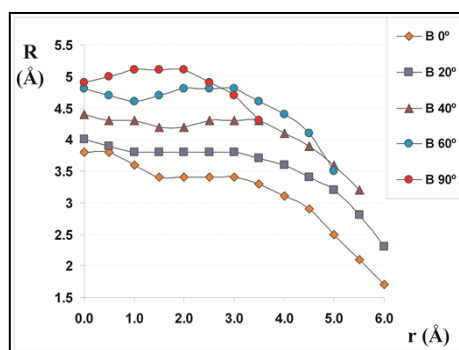

b)

35

40

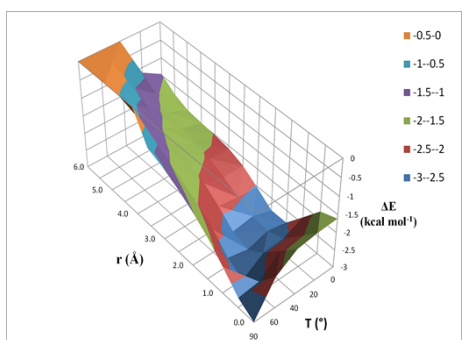

a)

45

**Fig. S8** a) Calculated interaction energies ( $\Delta E$ ) presented on 2-D (up) and 3-D (down) diagrams; b) the optimal normal distances ( $R$ ) of orientation B (Figure S6) for values of tilt  $P_1/P_2$  angle of  $0^\circ$ ,  $20^\circ$ ,  $40^\circ$ ,  $60^\circ$  and  $90^\circ$ . The values for angle  $0^\circ$  are obtained in previous work<sup>15</sup>

50

55

60

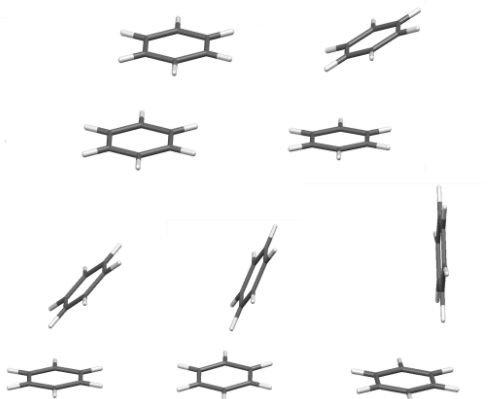

5 Fig. S9 The side view of the C orientation at different values of tilt angles ( $0^\circ$ ,  $20^\circ$ ,  $40^\circ$ ,  $60^\circ$  and  $90^\circ$ ) for the offset  $r$  of  $1.5\text{\AA}$ .

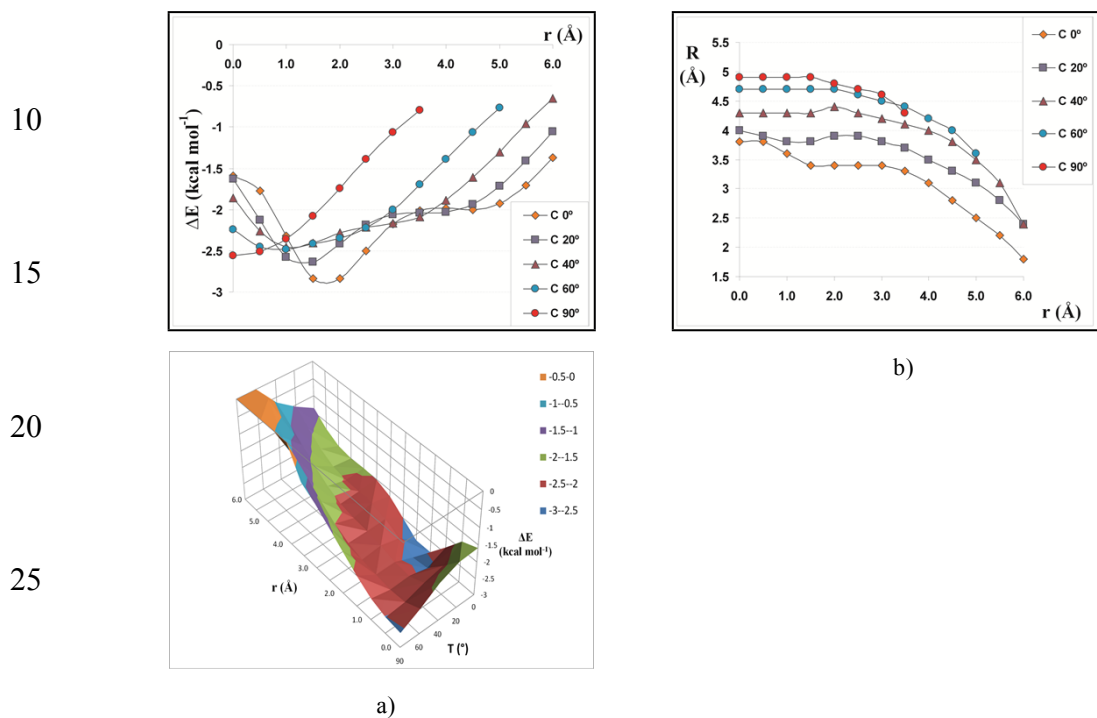

30 Fig. S10 a) Calculated interaction energies ( $\Delta E$ ) presented on 2-D (up) and 3-D (down) diagrams; b) the optimal normal distances ( $R$ ) of orientation C (Figure S8) for values of tilt  $P_1/P_2$  angle of  $0^\circ$ ,  $20^\circ$ ,  $40^\circ$ ,  $60^\circ$  and  $90^\circ$ . The values for angle  $0^\circ$  are obtained in previous work<sup>15</sup>

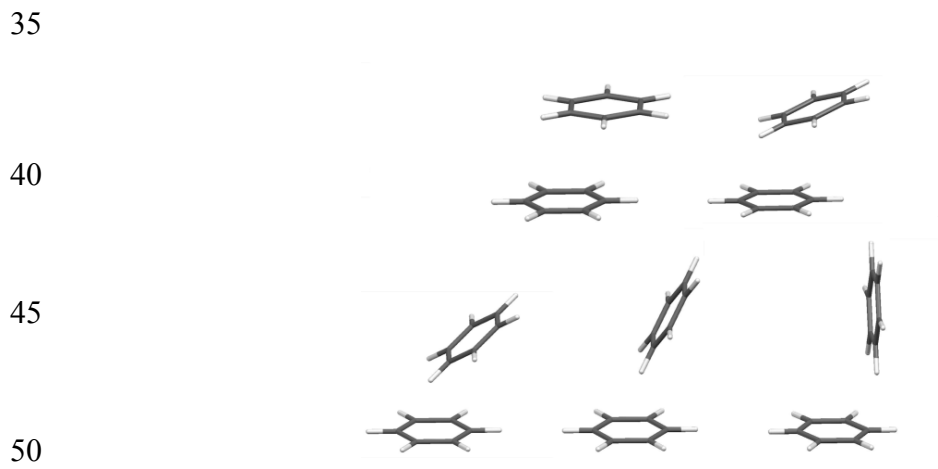

Fig. S11 The side view of the D orientation at different values of tilt angles ( $0^\circ$ ,  $20^\circ$ ,  $40^\circ$ ,  $60^\circ$  and  $90^\circ$ ) for the offset  $r$  of  $1.5\text{\AA}$ .

55  
60

5

10

15

20

25

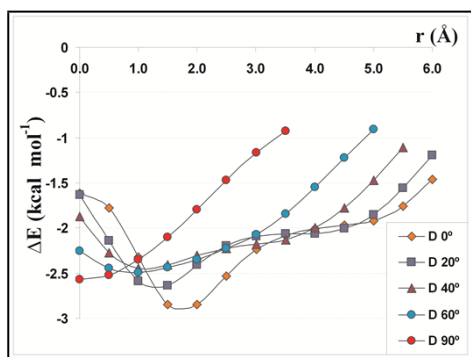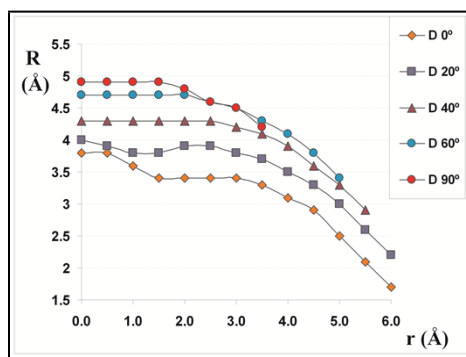

b)

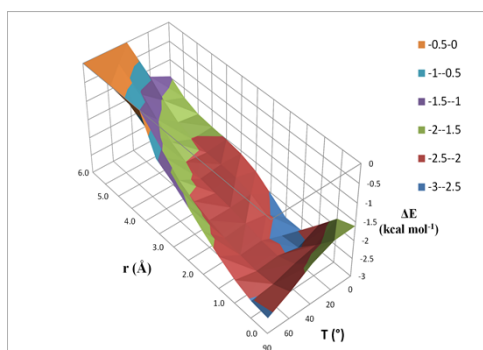

a)

**Fig. S12** a) Calculated interaction energies ( $\Delta E$ ) presented on 2-D (up) and 3-D (down) diagrams; b) the optimal normal distances ( $R$ ) of orientation D (Figure S10) for values of tilt  $P_1/P_2$  angle of  $0^\circ$ ,  $20^\circ$ ,  $40^\circ$ ,  $60^\circ$  and  $90^\circ$ . The values for angle  $0^\circ$  are obtained in previous work<sup>15</sup>

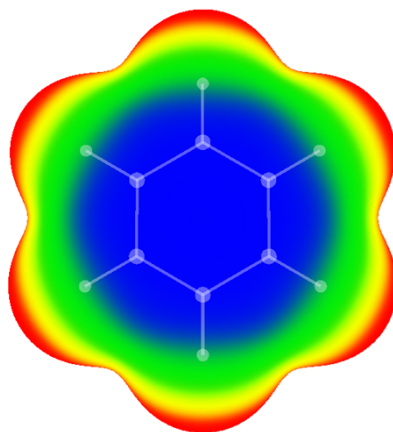

35

**Fig.S13** The view of electrostatic potential map of benzene,  $C_6H_6$ ; electrostatic potential increases from blue ( $V(r) < -8.9$  kcal/mol) and green ( $V(r) = -8.9$  to  $0.0$  kcal/mol) to yellow ( $V(r) = 0.0$  to  $+6.7$  kcal/mol) and red ( $V(r) > +6.7$  kcal/mol); grey dots and lines represent atoms and bonds.

40

[S1] Manfred J. Sippl, *J.Mol.Biol.*,1990, **213**, 859.

[S2] F. A. Bulat and A. Toro-Labbe, 'WFA: A suite of programs to analyse wavefunctions', unpublished; F. A. Bulat, A. Toro-Labbe, T. Brinck, J. S. Murray, P. Politzer, *J. Mol. Model.*,2010, **16**,1679.
